# Supplementary material for: Bismuth−Antimony Alloy Embedded in Carbon Matrix for Ultra-Stable Sodium Storage
Source: MDPI journal article supplement (doi:10.3390/ma16062189), 2023-03-09
Supplement: s1 [file s1]

**Supplementary material:**

# **Bismuth–Antimony Alloy Embedded in Carbon Matrix for Ultra-Stable Sodium Storage**

**Wensheng Ma, Bin Yu, Fuquan Tan, Hui Gao \* and Zhonghua Zhang \***

Key Laboratory for Liquid-Solid Structural Evolution and Processing of Materials (Ministry of Education), School of Materials Science and Engineering, Shandong University, Jingshi Road 17923, Jinan 250061, China

\* Correspondence: hgao199306@gmail.com (H.G.); zh\_zhang@sdu.edu.cn (Z.Z.)

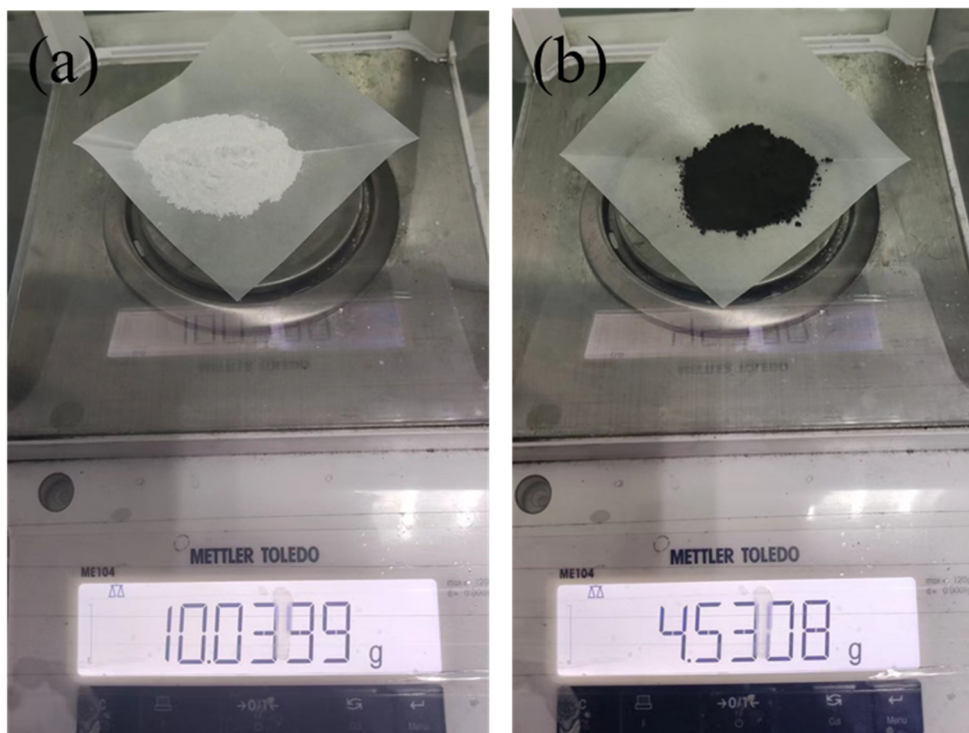

Figure S1. The photographs of (a) a mixture of bismuth citrate and antimony potassium tartrate in a molar ratio of 1:1 and (b) the obtained  $\text{Bi}_1\text{Sb}_1@\text{C}$  sample after cleaning and drying.

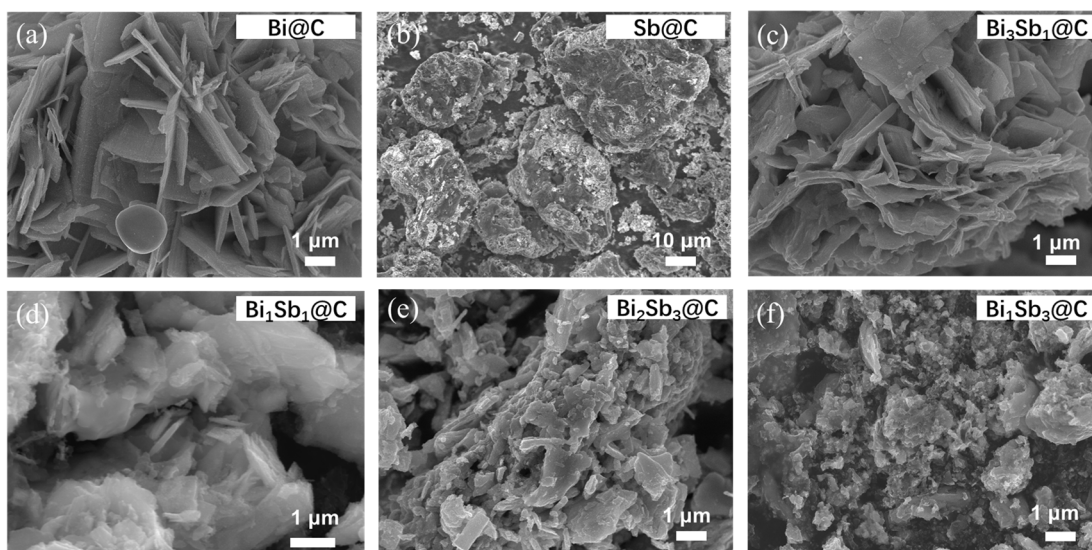

Figure S2. The SEM images at low magnifications of the (a) Bi@C, (b) Sb@C, (c) Bi<sub>3</sub>Sb<sub>1</sub>@C, (d) Bi<sub>1</sub>Sb<sub>1</sub>@C, (e) Bi<sub>2</sub>Sb<sub>3</sub>@C and (f) Bi<sub>1</sub>Sb<sub>3</sub>@C samples.

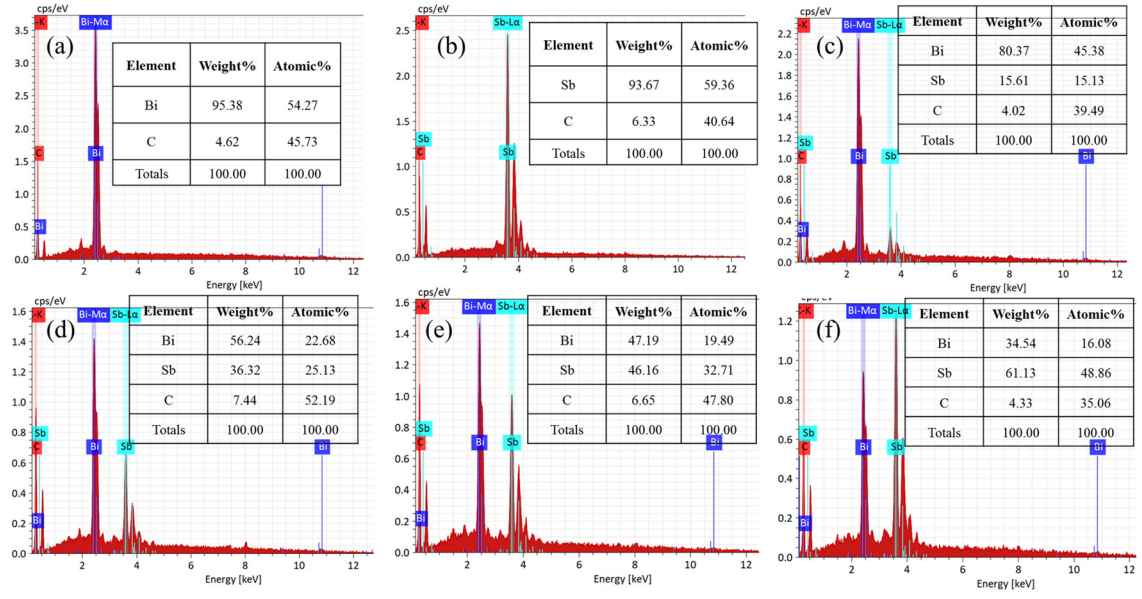

Figure S3. The corresponding EDX results of the (a)Bi@C, (b) Sb@C, (c) Bi<sub>3</sub>Sb<sub>1</sub>@C, (d) Bi<sub>1</sub>Sb<sub>1</sub>@C, (e) Bi<sub>2</sub>Sb<sub>3</sub>@C, and (f) Bi<sub>1</sub>Sb<sub>3</sub>@C samples.

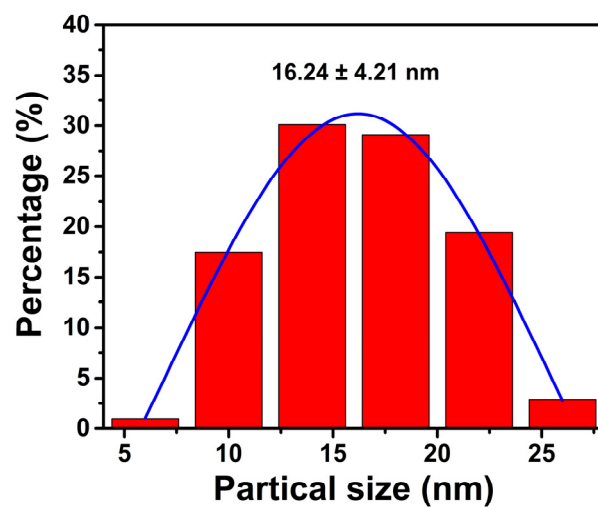

Figure S4. The size distribution pattern of the Bi<sub>1</sub>Sb<sub>1</sub> alloy for the Bi<sub>1</sub>Sb<sub>1</sub>@C sample.

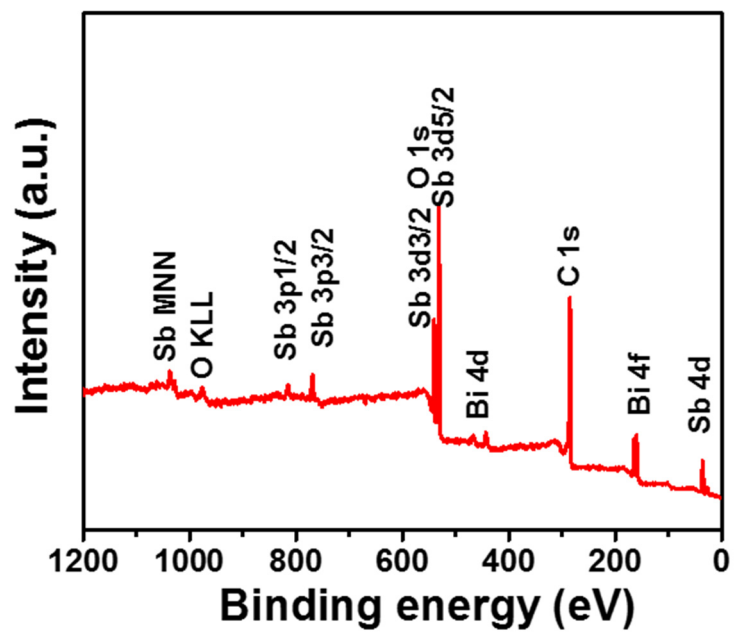

Figure S5. The low-resolution XPS spectrum of the Bi<sub>1</sub>Sb<sub>1</sub>@C sample.

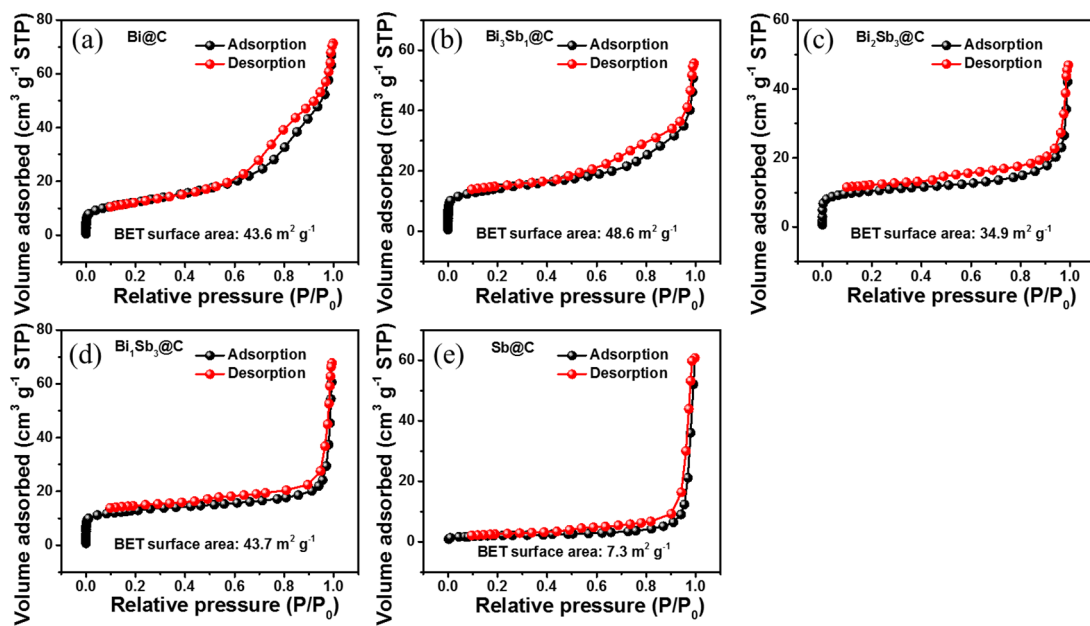

Figure S6. N<sub>2</sub> adsorption-desorption isotherms of the (a) Bi@C, (b) Bi<sub>3</sub>Sb<sub>1</sub>@C, (c) Bi<sub>2</sub>Sb<sub>3</sub>@C, (d) Bi<sub>1</sub>Sb<sub>3</sub>@C, and (e) Sb@C samples.

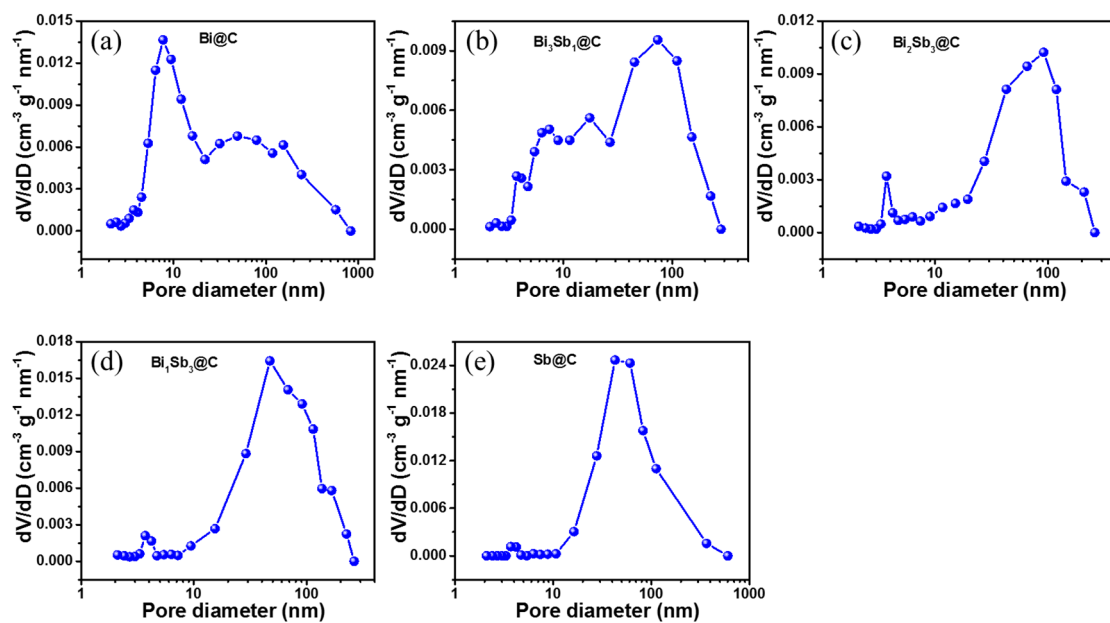

Figure S7. The pore size distribution curves of the (a) Bi@C, (b) Bi<sub>3</sub>Sb<sub>1</sub>@C, (c) Bi<sub>2</sub>Sb<sub>3</sub>@C, (d) Bi<sub>1</sub>Sb<sub>3</sub>@C, and (e) Sb@C samples.

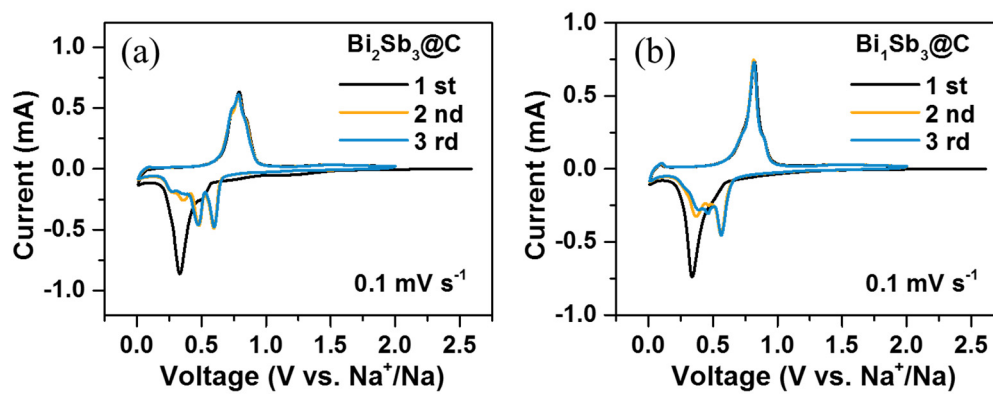

Figure S8. Initial three cycles of CV curves at a scan rate of  $0.1 \text{ mV s}^{-1}$  of the (a)  $\text{Bi}_2\text{Sb}_3@\text{C}$  and (b)  $\text{Bi}_1\text{Sb}_3@\text{C}$  samples.

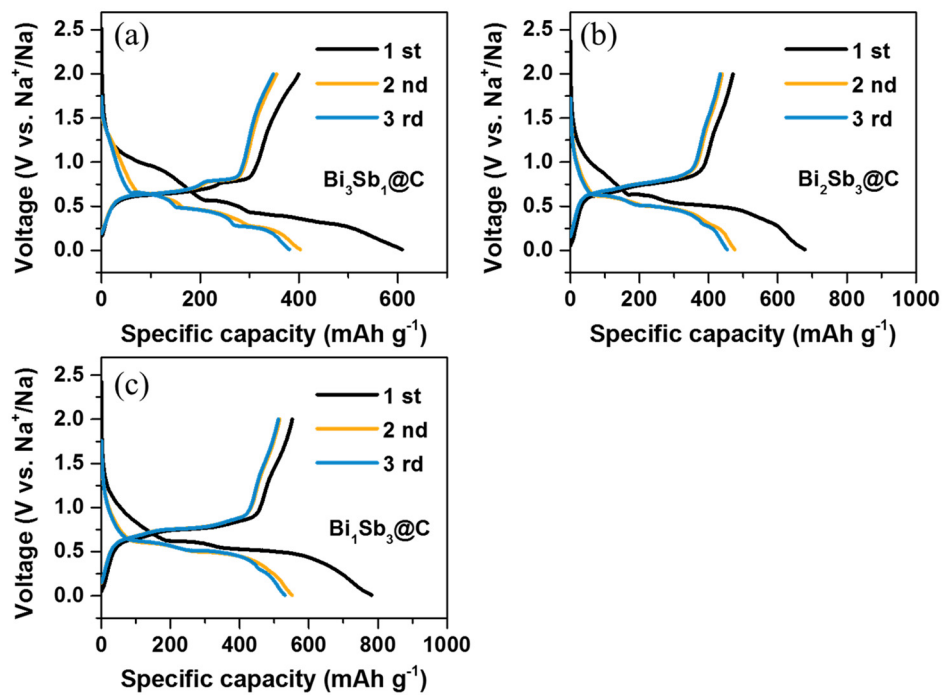

Figure S9. The discharge-charge curves of the (a) Bi<sub>3</sub>Sb<sub>1</sub>@C, (b) Bi<sub>2</sub>Sb<sub>3</sub>@C, and (c) Bi<sub>1</sub>Sb<sub>3</sub>@C samples during the initial three cycles.

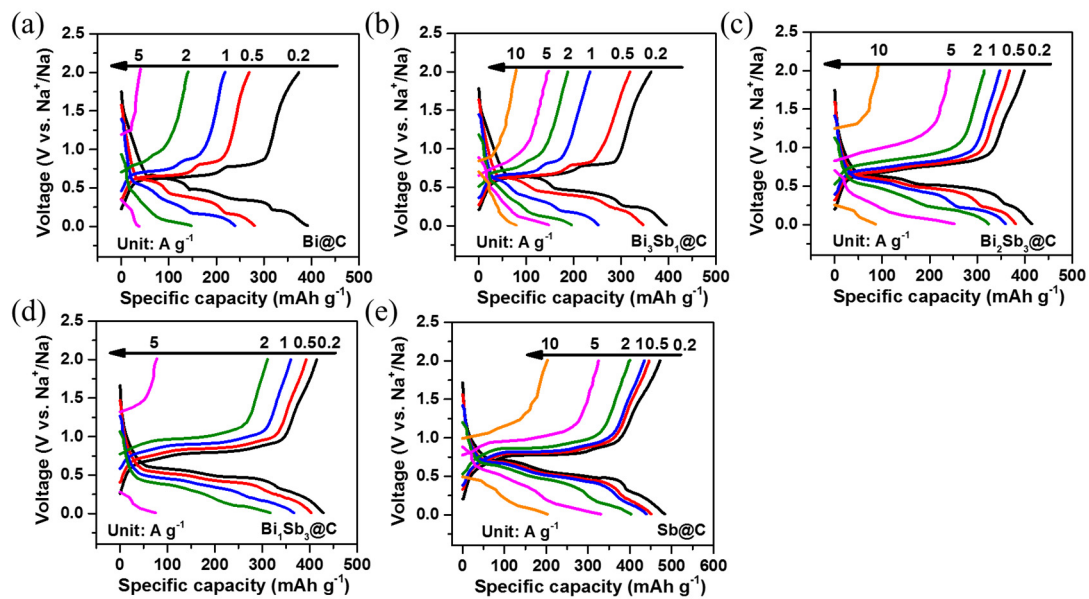

Figure S10. The discharge-charge profiles at different current densities of the (a)  $\text{Bi@C}$ , (b)  $\text{Bi}_3\text{Sb}_1\text{@C}$ , (c)  $\text{Bi}_2\text{Sb}_3\text{@C}$ , (d)  $\text{Bi}_1\text{Sb}_3\text{@C}$ , and (e)  $\text{Sb@C}$  samples.

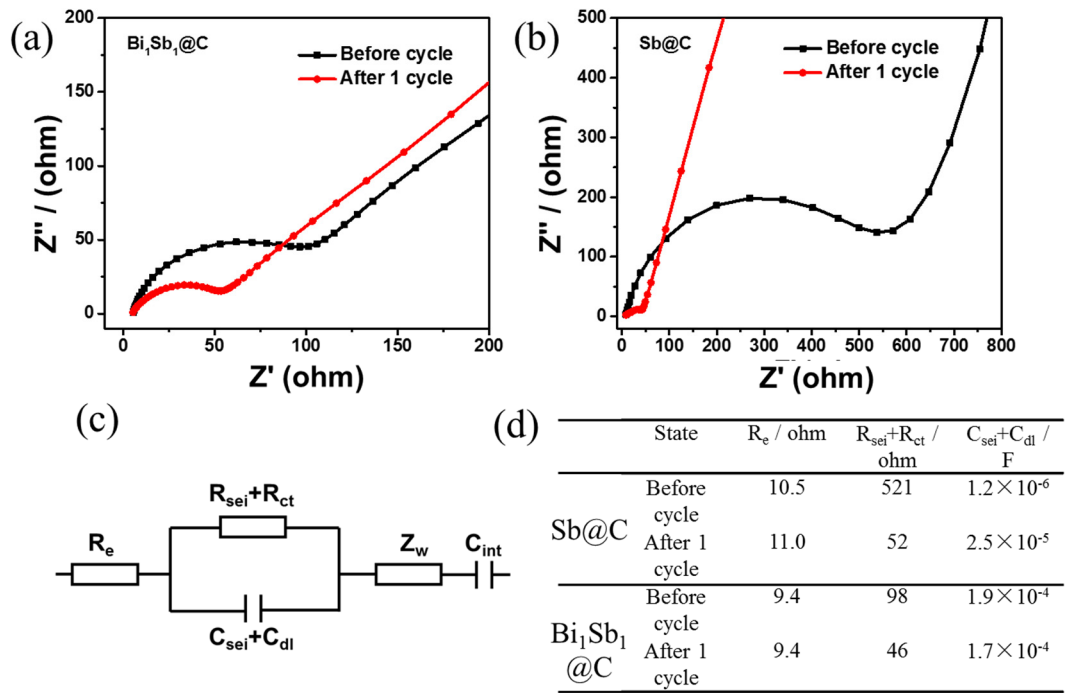

Figure S11. Nyquist plots of (a)  $\text{Bi}_1\text{Sb}_1@\text{C}$  and (b)  $\text{Sb}@\text{C}$  before/after the first cycle. (c, d) Fitted circuit diagram and corresponding fitting results.

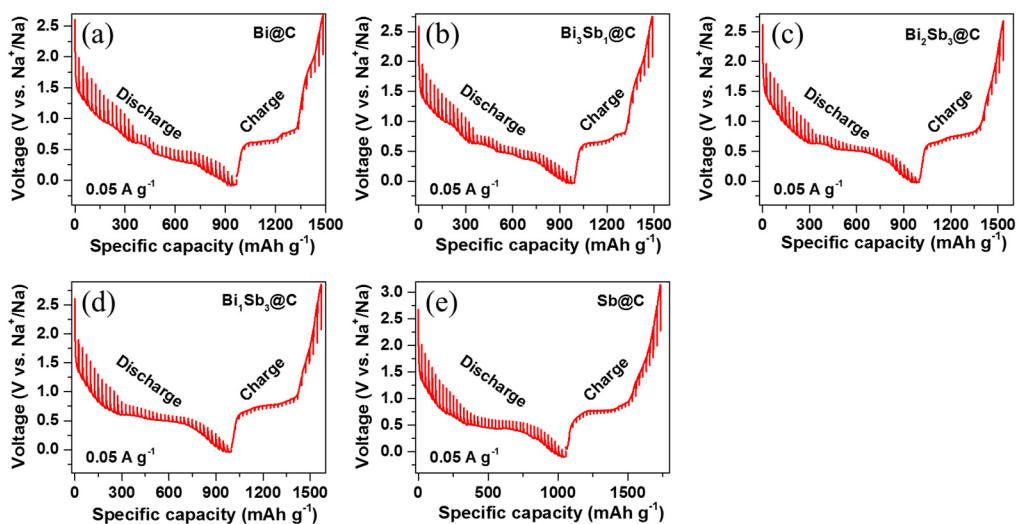

Figure S12. The GITT curves of the (a) Bi@C, (b) Bi<sub>3</sub>Sb<sub>1</sub>@C, (c) Bi<sub>2</sub>Sb<sub>3</sub>@C, (d) Bi<sub>1</sub>Sb<sub>3</sub>@C, and (e) Sb@C samples during the first discharge and charge processes.

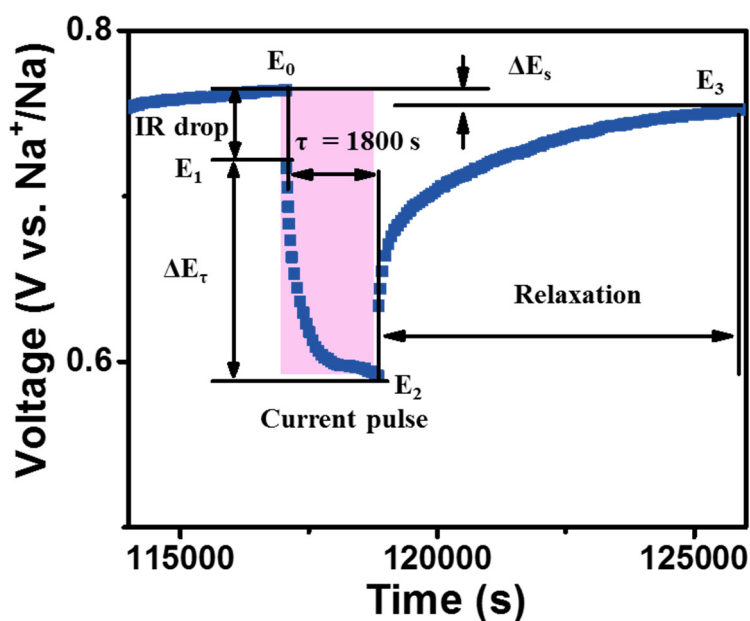

Figure S13. Schematic of one discharge pulse at  $\sim 0.75$  V (vs.  $\text{Na}^+/\text{Na}$ ) for the  $\text{Bi}_1\text{Sb}_1@\text{C}$  electrode during discharge process.  $\Delta E_s$  and  $\Delta E_\tau$  represent the steady-state voltage change and transient voltage change, respectively. During a pulse discharge, the voltage rapidly drops from  $E_0$  to  $E_1$  due to ohmic and charge transfer resistance ( $IR = E_0 - E_1$ ). Then the voltage gradually decreases to  $E_2$  due to the sodiation process of electrode. During the relaxation process, the voltage returns to the steady state ( $E_3$ ). The values of  $\Delta E_s$  and  $\Delta E_\tau$  are calculated by  $\Delta E_s = E_0 - E_3$  and  $\Delta E_\tau = E_1 - E_2$ , respectively.

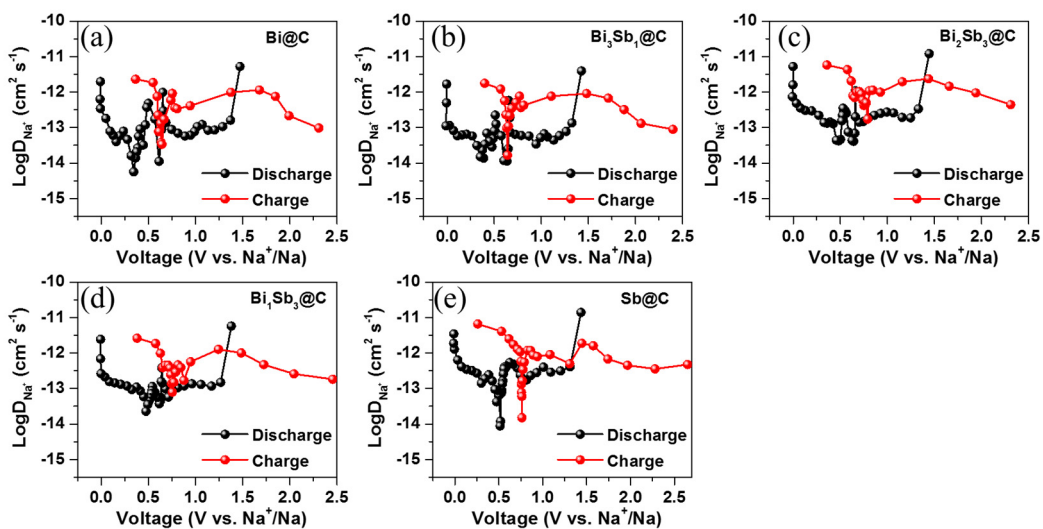

Figure S14. The diffusion rate for  $\text{Na}^+$  of the (a)  $\text{Bi@C}$ , (b)  $\text{Bi}_3\text{Sb}_1\text{@C}$ , (c)  $\text{Bi}_2\text{Sb}_3\text{@C}$ , (d)  $\text{Bi}_1\text{Sb}_3\text{@C}$ , and (e)  $\text{Sb@C}$  samples during the first discharge and charge processes.
